# Supplementary material for: Portable paper-in-tip spray ionization for the direct mass spectrometric analysis of target analytes in biofluid samples
Source: Royal Society of Chemistry journal article supplement (doi:10.1039/d1ay01907d), 2021-12-08
Supplement: d1ay01907d1.pdf [file d1ay01907d1.pdf]

## Electronic Supplementary Information

### **Portable Paper-In-Tip Spray Ionization for the Direct Mass Spectrometric Analysis of Target Analytes in Biofluid Samples**

*Fangfang Lu,<sup>a</sup> Yajun Zheng,<sup>a</sup> Yuan Zhang,<sup>a</sup> Qiang Ma,<sup>b</sup> and Zhiping Zhang<sup>a,\*</sup>*

<sup>a</sup> *School of Chemistry and Chemical Engineering, Xi'an Shiyou University, Xi'an 710065, China*

<sup>b</sup> *Chinese Academy of Inspection and Quarantine, Beijing 100176, China*

\* To whom correspondence should be addressed.

E-mail: zhipingzhang@xsyu.edu.cn

## Table of Contents

|                                                                                                                           |     |
|---------------------------------------------------------------------------------------------------------------------------|-----|
| (1) Texture Properties of Paper Substrates Impregnated with Different Polymers ..                                         | S3  |
| (2) Selected Reaction Monitoring Conditions .....                                                                         | S3  |
| (3) Recoveries and Relative Standard Deviations of Different Therapeutic Drugs Using Paper-In-Tube Spray Ionization ..... | S4  |
| (4) Examination on the Swelling Performance of PS-Impregnated Paper Substrate                                             | S5  |
| (5) Procedures for Paper-In-Tube Spray Ionization (PITSI) .....                                                           | S6  |
| (6) Surface Properties of Polymer-Impregnated Paper Substrates .....                                                      | S7  |
| (7) Effect of the Type of Polymer-Impregnated Paper on Analysis Sensivity .....                                           | S8  |
| (8) Effect of the Distance between Paper Tip and the Orifice of Pipette Tip on the Spray Duration of Chronogram.....      | S9  |
| (9) Effect of the Concentration of Clozapine in Urine on the Spray Duration of Chronogram .....                           | S10 |
| (10) Effect of Experimental Conditions on the Analysis Sensivity of PITSI-MS.....                                         | S11 |
| (11) Comparison of the Spray Current of PITSI, PSI, CBSI, and TSI .....                                                   | S14 |
| (12) Repeatability of PITSI in Analysis of Different Drugs in Urine .....                                                 | S15 |
| (13) Quantitative Analysis of Different Drugs in Various Matrixes.....                                                    | S16 |
| (14) Comparison of the Performance of PSI and PITSI in the Analysis of Proteins....                                       | S19 |

## (1) Texture Properties of Paper Substrates Impregnated with Different Polymers

**Table S1.** Texture properties of paper substrates impregnated with different polymers

| Paper substrate | Specific surface area<br>(m <sup>2</sup> g <sup>-1</sup> ) <sup>[a]</sup> | Average pore diameter<br>[nm] <sup>[b]</sup> | Pore volume<br>[cm <sup>3</sup> g <sup>-1</sup> ] |
|-----------------|---------------------------------------------------------------------------|----------------------------------------------|---------------------------------------------------|
| PMMA            | 1.68                                                                      | 9.49                                         | 0.002                                             |
| PVA             | 2.24                                                                      | 14.70                                        | 0.003                                             |
| PET             | 3.71                                                                      | 4.45                                         | 0.336                                             |
| PE              | 1.65                                                                      | 6.62                                         | 0.001                                             |
| PAN             | 5.03                                                                      | 14.90                                        | 0.002                                             |
| PS              | 3.70                                                                      | 6.77                                         | 0.005                                             |

*Note:* <sup>[a]</sup> Using the standard Brunauer-Emmett-Teller (BET) method; <sup>[b]</sup> Using the Barret-Joyner-Halenda (BJH) method.

## (2) Selected Reaction Monitoring Conditions

**Table S2.** Selected reaction monitoring (SRM) conditions

| Analyte                       | Parent Ion ( <i>m/z</i> ) | Fragment Ion ( <i>m/z</i> ) | Collision Energy (V) | Tube Lens (V) |
|-------------------------------|---------------------------|-----------------------------|----------------------|---------------|
| amitriptyline                 | 278, [M + H] <sup>+</sup> | 84                          | 25                   | 83            |
| D <sub>3</sub> -amitriptyline | 281, [M + H] <sup>+</sup> | 87                          | 23                   | 83            |
| clozapine                     | 327, [M + H] <sup>+</sup> | 270                         | 21                   | 89            |
| D <sub>8</sub> -clozapine     | 335, [M + H] <sup>+</sup> | 275                         | 21                   | 91            |
| amisulpride                   | 370, [M + H] <sup>+</sup> | 112                         | 24                   | 95            |
| D <sub>5</sub> -amisulpride   | 375, [M + H] <sup>+</sup> | 117                         | 25                   | 96            |
| quetiapine                    | 384, [M + H] <sup>+</sup> | 253                         | 21                   | 97            |
| D <sub>8</sub> -quetiapine    | 392, [M + H] <sup>+</sup> | 258                         | 23                   | 98            |
| risperidone                   | 411, [M + H] <sup>+</sup> | 191                         | 26                   | 90            |
| D <sub>4</sub> -risperidone   | 415, [M + H] <sup>+</sup> | 195                         | 26                   | 91            |
| aripiprazole                  | 448, [M + H] <sup>+</sup> | 285                         | 25                   | 109           |
| D <sub>8</sub> -aripiprazole  | 456, [M + H] <sup>+</sup> | 293                         | 25                   | 106           |

### (3) Recoveries and Relative Standard Deviations of Different Therapeutic Drugs Using Paper-In-Tube Spray Ionization

**Table S3.** Recoveries and relative standard deviations (RSDs) of different therapeutic drugs (n = 4)

| Drug          | Spiked concentration (ng mL <sup>-1</sup> ) | Measured concentration (ng mL <sup>-1</sup> ) | Recovery (%) | RSD (%) |
|---------------|---------------------------------------------|-----------------------------------------------|--------------|---------|
| amitriptyline | 10.0                                        | 9.9 ± 0.6                                     | 99.0         | 5.86    |
|               | 100.0                                       | 101.1 ± 6.0                                   | 101.1        | 5.92    |
|               | 1000.0                                      | 996.1 ± 39.9                                  | 99.6         | 4.01    |
| clozapine     | 10.0                                        | 10.0 ± 0.4                                    | 100.0        | 3.64    |
|               | 100.0                                       | 99.8 ± 5.3                                    | 99.8         | 5.29    |
|               | 1000.0                                      | 1000.8 ± 43.2                                 | 100.1        | 4.32    |
| amisulpride   | 10.0                                        | 9.9 ± 0.3                                     | 99.0         | 3.28    |
|               | 100.0                                       | 100.9 ± 6.7                                   | 100.9        | 6.62    |
|               | 1000.0                                      | 996.9 ± 63.9                                  | 99.7         | 6.41    |
| quetiapine    | 10.0                                        | 10.3 ± 0.5                                    | 103.0        | 4.48    |
|               | 100.0                                       | 96.7 ± 6.5                                    | 96.7         | 6.74    |
|               | 1000.0                                      | 1011.1 ± 37.1                                 | 101.1        | 3.67    |
| risperidone   | 10.0                                        | 9.9 ± 0.5                                     | 99.0         | 5.49    |
|               | 100.0                                       | 100.6 ± 4.5                                   | 100.6        | 4.48    |
|               | 1000.0                                      | 998.1 ± 50.5                                  | 99.8         | 5.03    |
| aripiprazole  | 10.0                                        | 10.1 ± 0.6                                    | 101.0        | 5.66    |
|               | 100.0                                       | 98.9 ± 6.2                                    | 98.9         | 6.27    |
|               | 1000.0                                      | 1003.8 ± 35.3                                 | 100.4        | 3.52    |

*Note:* Spray solvent: acetonitrile; Applied voltage: 3.5 kV; Sample volume: 20 µL of urine spiked with different concentrations of pharmaceutical drugs.

#### (4) Examination on the Swelling Performance of PS-Impregnated Paper Substrate

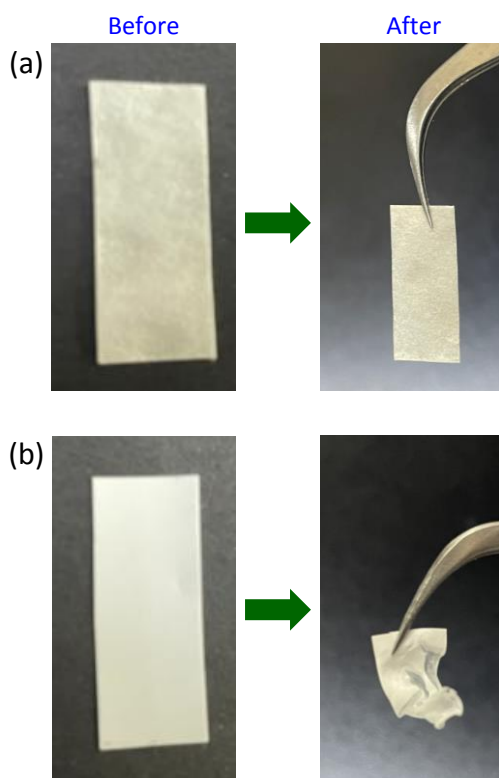

**Figure S1.** Comparison of the surface structures of **(a)** as-synthesized PS-impregnated paper substrate and **(b)** acetic acid/nitric acid mixed fiber membrane before and after immersing in acetonitrile for 1 min.

## (5) Procedures for Paper-In-Tube Spray Ionization (PITSI)

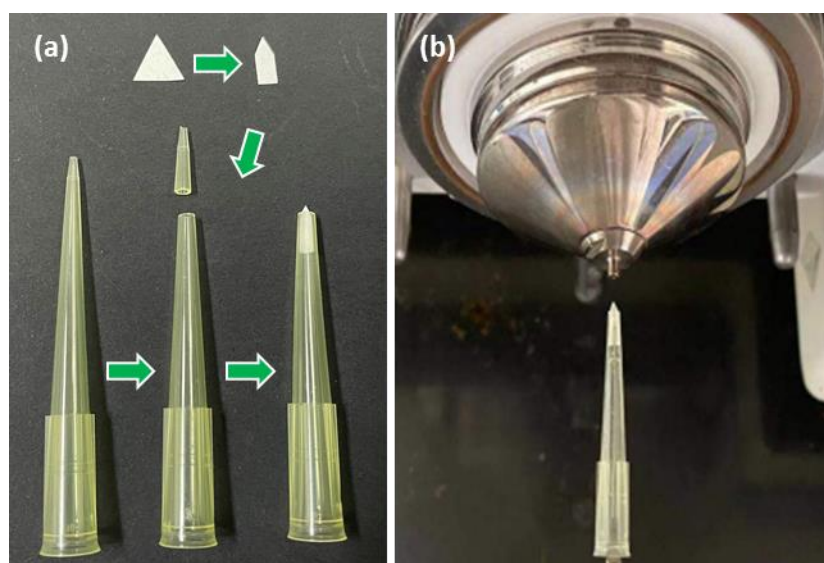

**Figure S2.** Photographic images (a) for preparing paper-in-tube unit and (b) for PITSI-MS.

## (6) Surface Properties of Polymer-Impregnated Paper Substrates

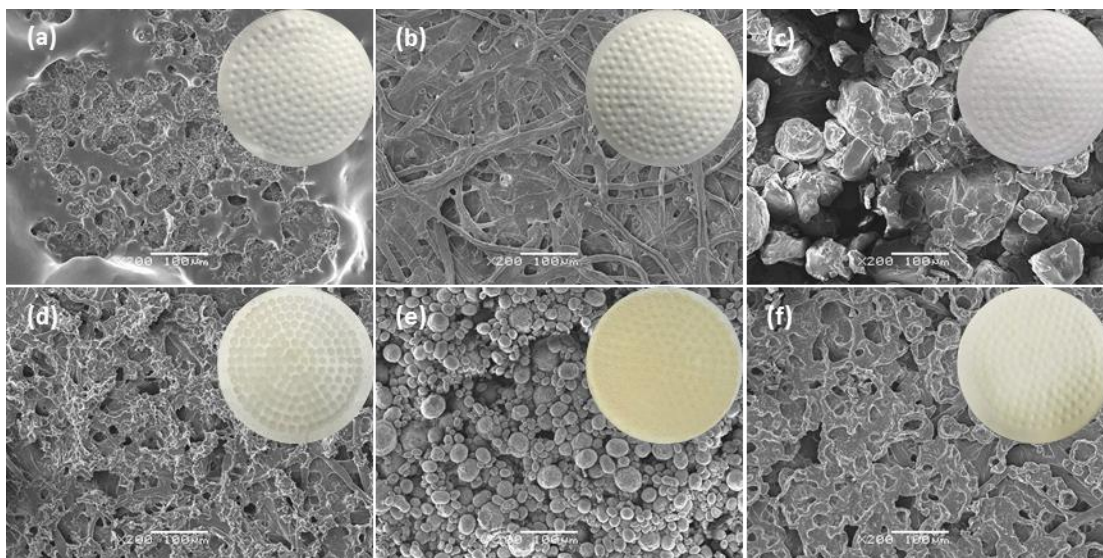

**Figure S3.** SEM images of paper substrates impregnated with different polymers: **(a)** PMMA, **(b)** PVA, **(c)** PET, **(d)** PE, **(e)** PAN and **(f)** PS (Note: The insets are the corresponding photographic images of coated papers).

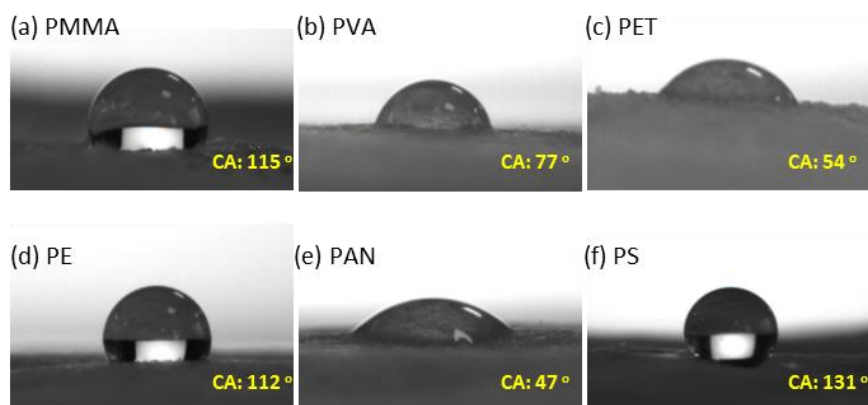

**Figure S4.** Photographic images of the hydrophobic properties of paper substrates impregnated with different polymers at room temperature: **(a)** PMMA, **(b)** PVA, **(c)** PET, **(d)** PE, **(e)** PAN and **(f)** PS (Note: CA means the water contact angel).

## (7) Effect of the Type of Polymer-Impregnated Paper on Analysis Sensitivity

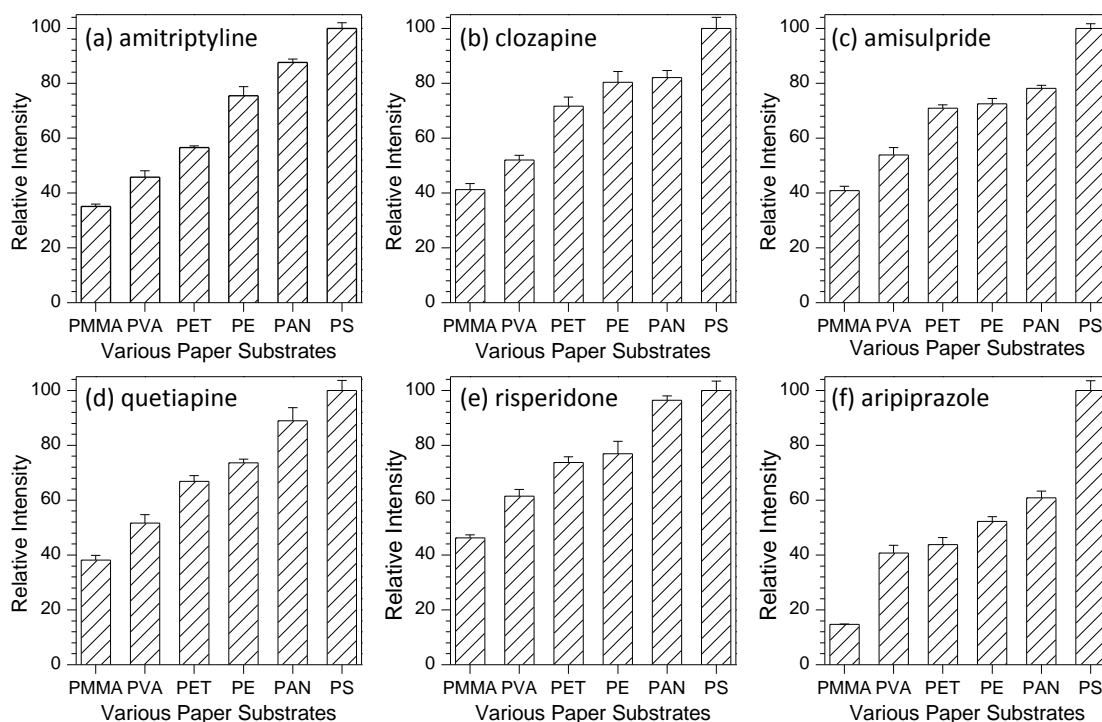

**Figure S5.** Effect of the type of polymer impregnated paper substrate on the analysis performance of different pharmaceutical drugs in urine: **(a)** amitriptyline, **(b)** clozapine, **(c)** amisulpride, **(d)** quetiapine, **(e)** risperidone and **(f)** aripiprazole (spray solvent: 20  $\mu\text{L}$  of acetonitrile; applied voltage: 3.5 kV; concentration of drugs: 100 ng  $\text{mL}^{-1}$ ).



**(8) Effect of the Distance between Paper Tip and the Orifice of Pipette Tip on the Spray Duration of Chronogram**

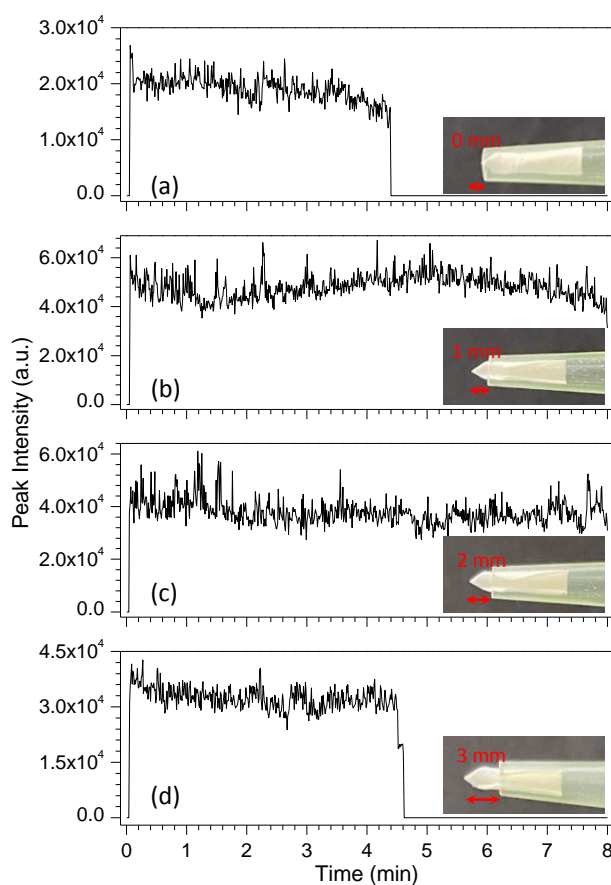

**Figure S6.** Effect of the distance of paper tip far away from the orifice of pipette tip on the duration of chronogram recorded using clozapine: **(a)** 0 mm, **(b)** 1 mm, **(c)** 2 mm, and **(d)** 3 mm (spray solvent: 20  $\mu$ L of acetonitrile; applied voltage: 3.5 kV; concentration of clozapine: 100 ng mL<sup>-1</sup>).

**(9) Effect of the Concentration of Clozapine in Urine on the Spray Duration of Chronogram**

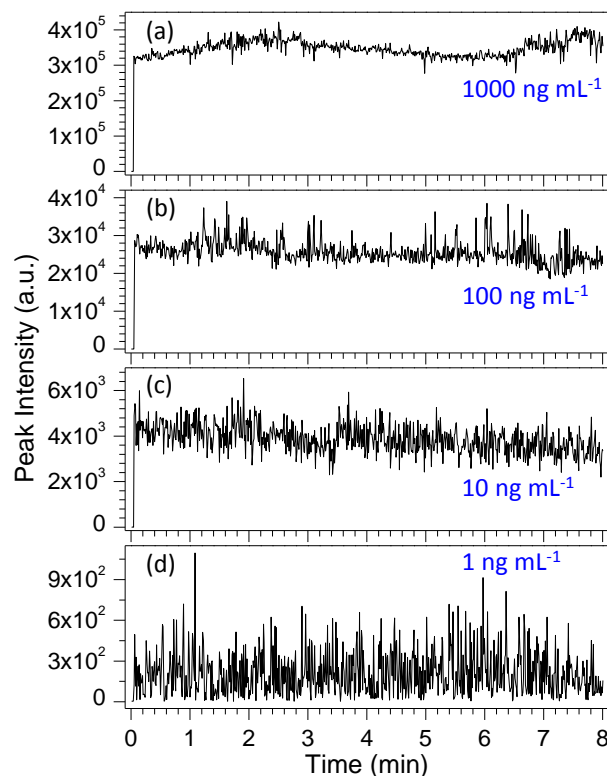

**Figure S7.** Effect of the concentration of clozapine in urine on the duration of chronogram: **(a)** 1000 ng mL<sup>-1</sup>, **(b)** 100 ng mL<sup>-1</sup>, **(c)** 10 ng mL<sup>-1</sup>, and **(d)** 1 ng mL<sup>-1</sup> (spray solvent: 20  $\mu$ L of acetonitrile; applied voltage: 3.5 kV; distance of paper tip far away from the orifice of pipette tip: 2 mm).

## (10) Effect of Experimental Conditions on the Analysis Sensivity of PITSI-MS

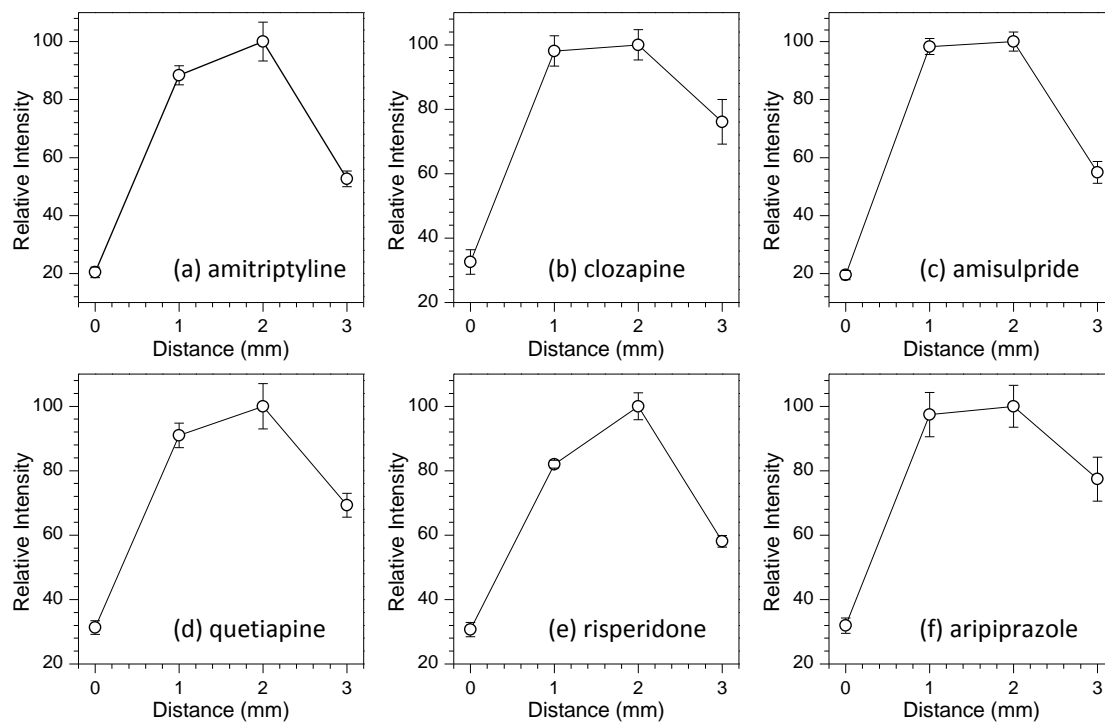

**Figure S8.** Effect of the distance of paper tip far away from the orifice of pipette tip on the analysis sensitivity of different therapeutic drugs: **(a)** amitriptyline, **(b)** clozapine, **(c)** amisulpride, **(d)** quetiapine, **(e)** risperidone, and **(f)** aripiprazole (spray solvent: 20  $\mu$ L of acetonitrile; applied voltage: 3.5 kV; concentration of drugs: 100 ng mL<sup>-1</sup>).

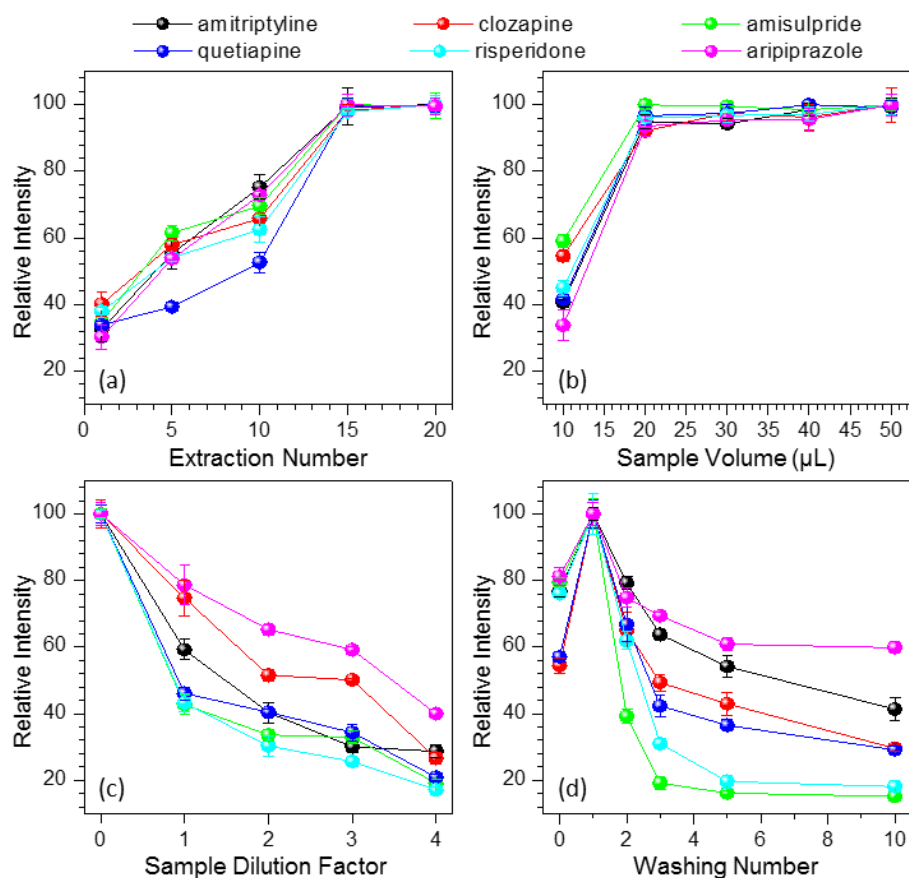

**Figure S9.** Effect of the experimental conditions on the analysis sensitivity of different drugs: **(a)** extraction number, **(b)** sample volume, **(c)** sample dilution factor, and **(d)** washing number (spray solvent: 20  $\mu\text{L}$  of acetonitrile; applied voltage: 3.5 kV; distance of paper tip far away from the orifice of pipette tip: 2 mm; size of pipette tip: 100  $\mu\text{L}$ ; concentration of drugs in urine: 100  $\text{ng mL}^{-1}$ ).

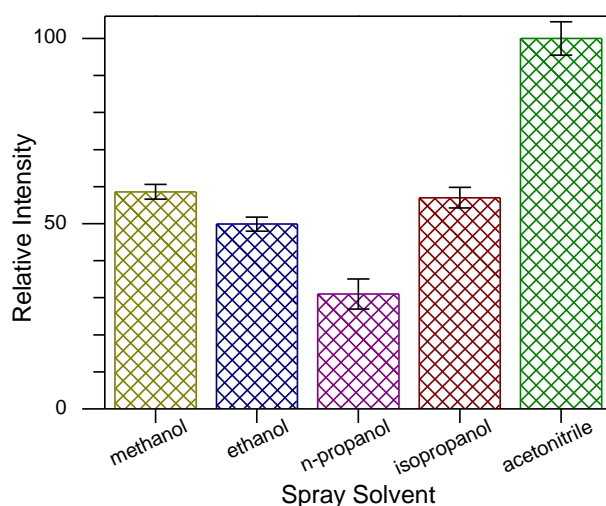

**Figure S10.** Effect of the spray solvent on the analysis sensitivity of verapamil (volume of spray solvent: 20  $\mu\text{L}$ ; applied voltage: 3.5 kV; distance of paper tip far away from the orifice of pipette tip: 2 mm; concentration of verapamil in urine: 100  $\text{ng mL}^{-1}$ ).

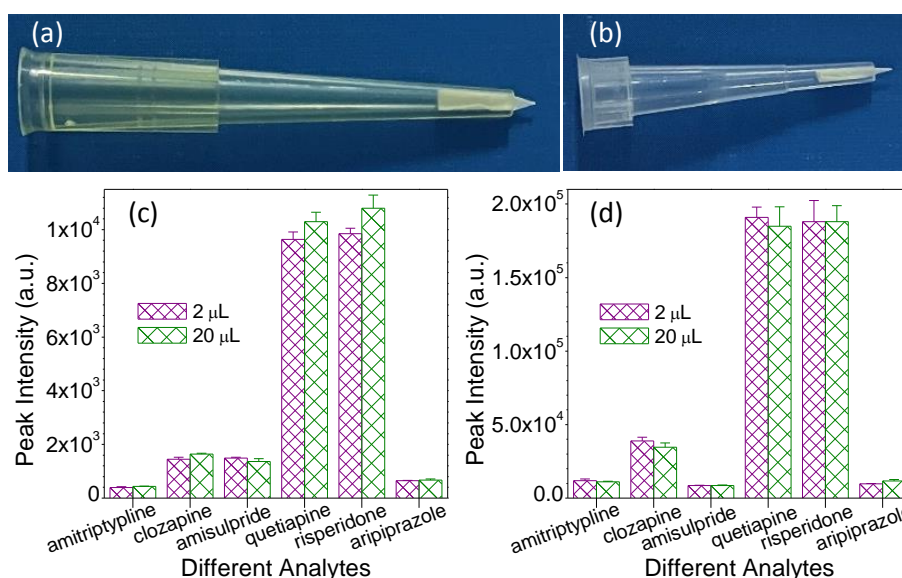

**Figure S11.** Photographic images of (a) 100  $\mu\text{L}$  and (b) 10  $\mu\text{L}$  of pipette tips incorporated with PS-impregnated paper substrate; comparison of the analysis sensitivity of different analytes with concentrations of (c) 1  $\text{ng mL}^{-1}$  and (d) 100  $\text{ng mL}^{-1}$  in urine and sample volumes of 2  $\mu\text{L}$  and 20  $\mu\text{L}$  (note: for the experiment with 2  $\mu\text{L}$  of urine, both the washing volume of water and the spray volume of acetonitrile were 2  $\mu\text{L}$ ; for the experiment with 20  $\mu\text{L}$  of urine, both the washing volume of water and the spray volume of acetonitrile were 20  $\mu\text{L}$ ).

### (11) Comparison of the Spray Current of PITSI, PSI, CBSI, and TSI

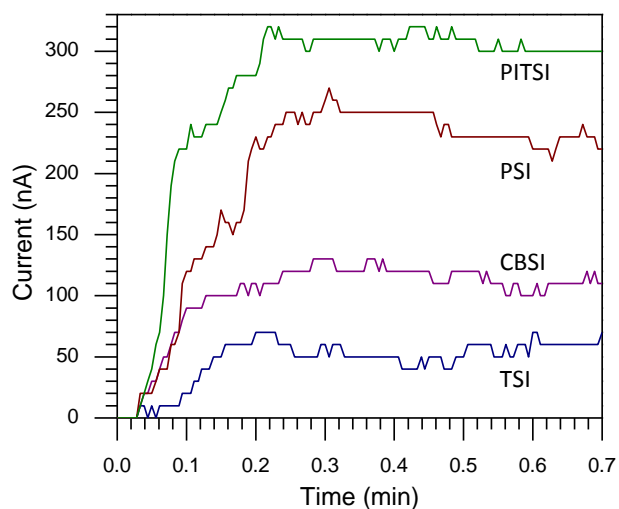

**Figure S12.** Comparison of the spray current of different ionization techniques (spray solvent: 20  $\mu$ L of 1:1 methanol/water containing 0.1% acetic acid; paper substrate: PS-impregnated paper; applied voltage: 3.5 kV).

## (12) Repeatability of PITSI in Analysis of Different Drugs in Urine

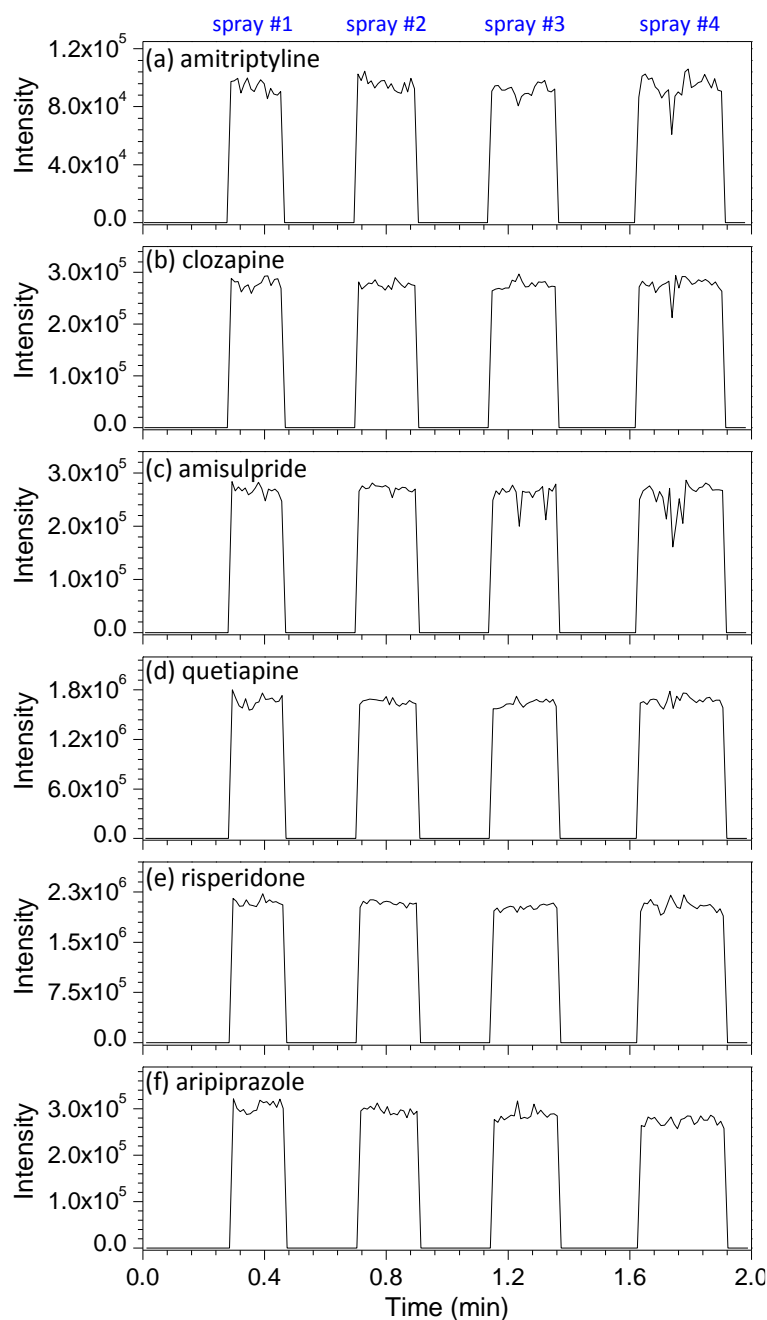

**Figure S13.** Simultaneous determination of different therapeutic drugs in urine with each concentration of  $1 \mu\text{g mL}^{-1}$ , and ion chronograms for (a) amitriptyline, (b) clozapine, (c) amisulpride, (d) quetiapine, (e) risperidone, and (f) aripiprazole using SRM mode of a Thermo TSQ (spray solvent:  $20 \mu\text{L}$  of acetonitrile; applied voltage: 3.5 kV).

### (13) Quantitative Analysis of Different Drugs in Various Matrixes

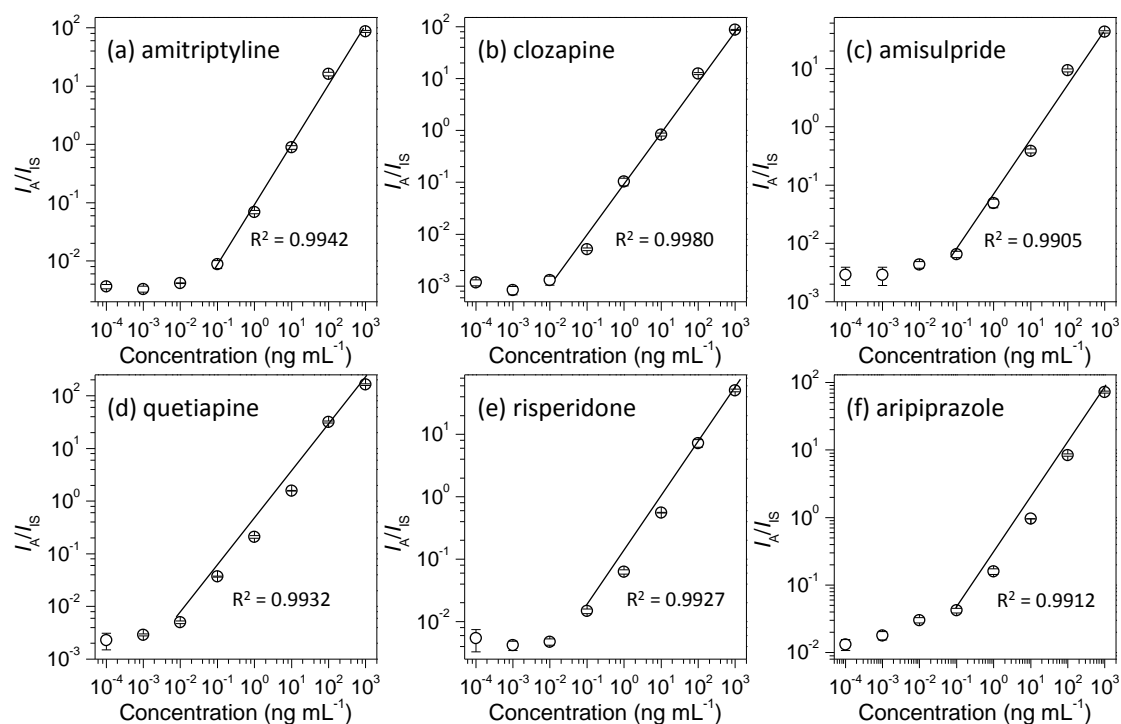

**Figure S14.** Quantitative analysis of urine samples spiked with (a) amitriptyline, (b) clozapine, (c) amisulpride, (d) quetiapine, (e) risperidone, and (f) aripiprazole (0.001 – 1000 ng mL<sup>-1</sup>) and its isotopomers (10 ng mL<sup>-1</sup>). Note: spray solvent: 20  $\mu$ L of acetonitrile; applied voltage: 3.5 kV; Bars represent the standard deviation of analysis for four replicates.



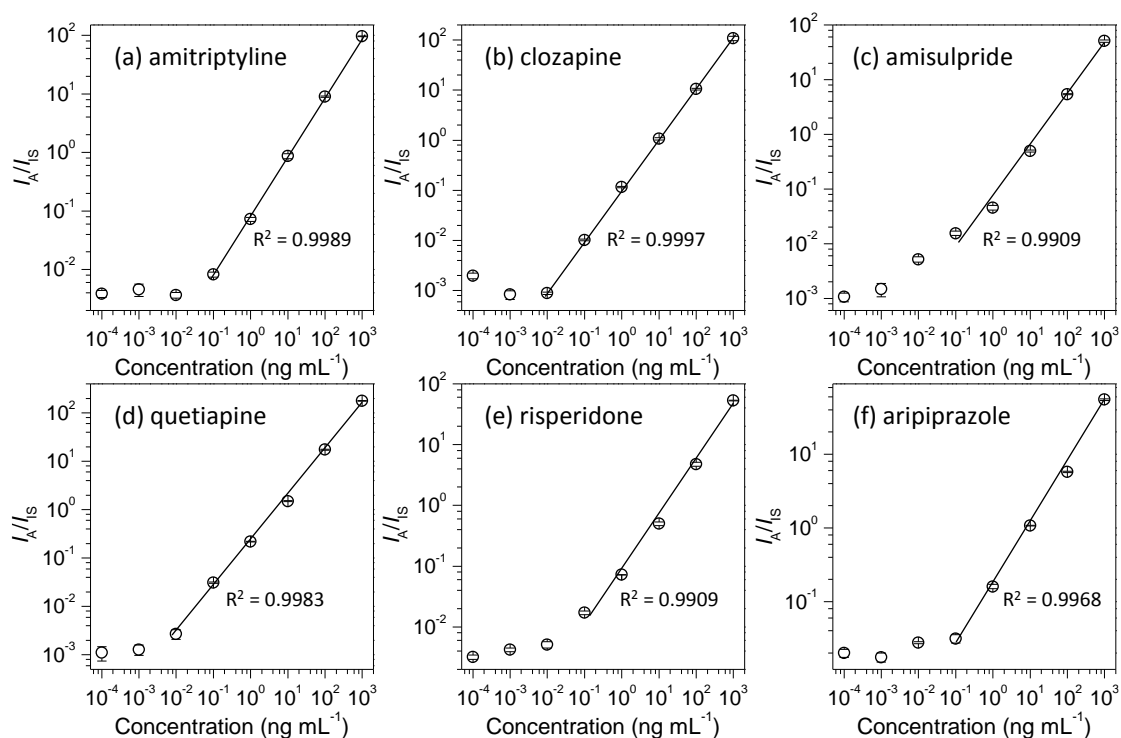

**Figure S15.** Quantitative analysis of 0.9% saline samples spiked with (a) amitriptyline, (b) clozapine, (c) amisulpride, (d) quetiapine, (e) risperidone, and (f) aripiprazole (0.001 – 1000 ng mL<sup>-1</sup>) and its isotopomers (10 ng mL<sup>-1</sup>). Note: spray solvent: 20  $\mu$ L of acetonitrile; applied voltage: 3.5 kV; Bars represent the standard deviation of analysis for four replicates.

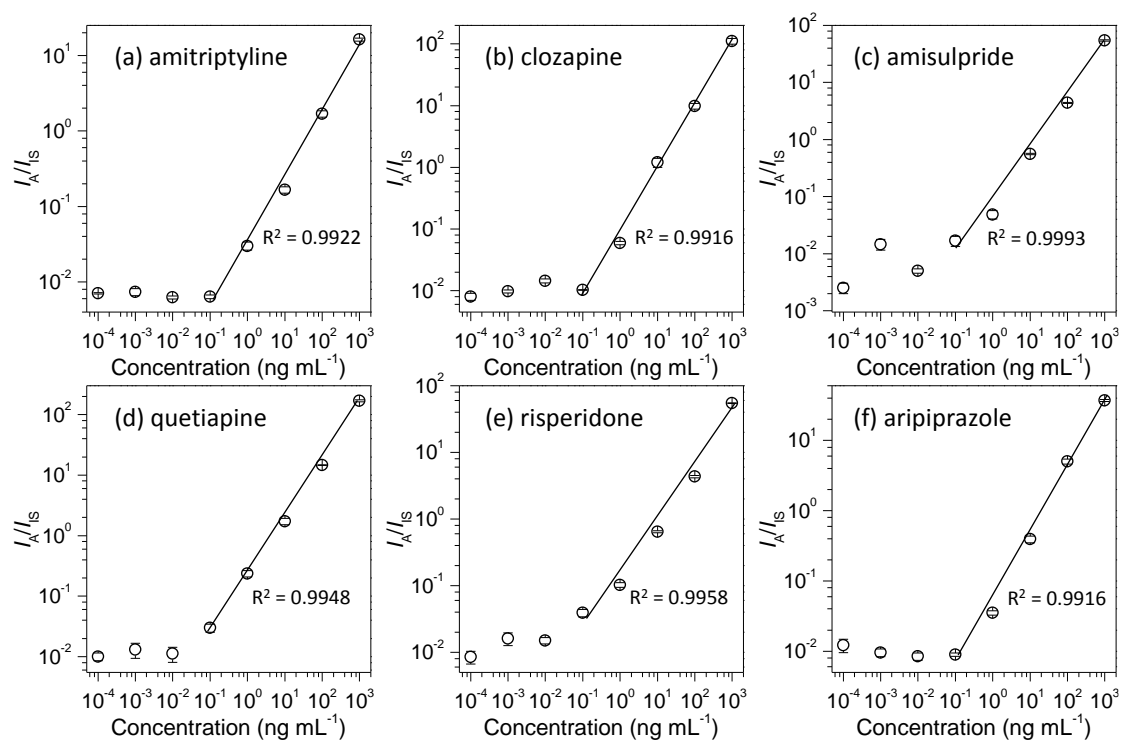

**Figure S16.** Quantitative analysis of serum samples spiked with (a) amitriptyline, (b) clozapine, (c) amisulpride, (d) quetiapine, (e) risperidone, and (f) aripiprazole (0.001 – 1000 ng mL<sup>-1</sup>) and its isotopomers (10 ng mL<sup>-1</sup>). Note: spray solvent: 20  $\mu$ L of acetonitrile; applied voltage: 3.5 kV; Bars represent the standard deviation of analysis for four replicates.

#### (14) Comparison of the Performance of PSI and PITSI in the Analysis of Proteins

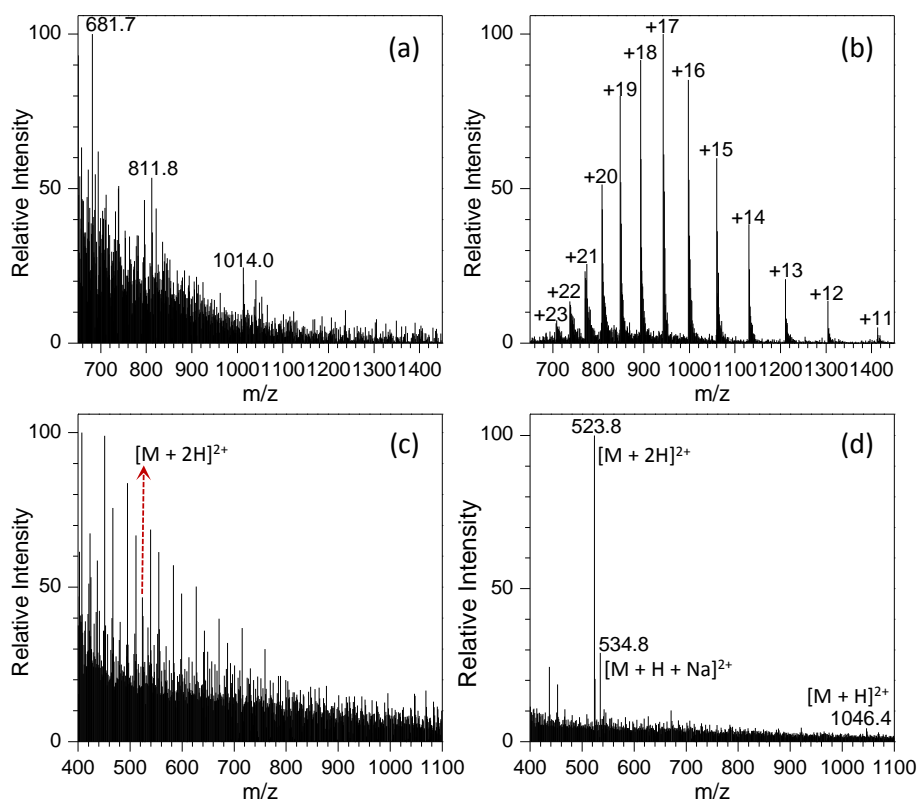

**Figure S17.** Comparison of the performances of (a, c) PSI and (b, d) PITSI in the analysis of different proteins in various matrices: (a, b) 200  $\mu\text{g mL}^{-1}$  of myoglobin in serum; (c, d) 100  $\mu\text{g mL}^{-1}$  of angiotensin II (spray solvent: 20  $\mu\text{L}$  of 1:1 methanol/water containing 0.5% acetic acid for PITSI and 20  $\mu\text{L}$  of 1:1 methanol/protein solution containing 0.5% acetic acid for PSI ; applied voltage: 3.5 kV; distance of paper tip far away from the orifice of pipette tip: 2 mm).
